# Supplementary material
Source: ML conference proceedings conference paper supplement (https://aclanthology.org/2019.icon-1.8)
Supplement: OptionalSupplementaryMaterial [file CM-SI-EH.pdf › supplementary material/CM-SI-EH.pdf]

True Class

ENG

&gt;99%

&lt;1%

&gt;99%

&lt;1%

KAN

70%

5%

15%

11%

70%

30%

MAL

5%

89%

3%

3%

89%

11%

TAM

17%

4%

74%

5%

74%

26%

TEL

&lt;1%

16%

2%

9%

74%

74%

26%

ENG

KAN

MAL

TAM

TEL

TPR

FNR

Predicted Class
