# Supplementary material
Source: ML conference proceedings conference paper supplement (https://aclanthology.org/2019.icon-1.8)

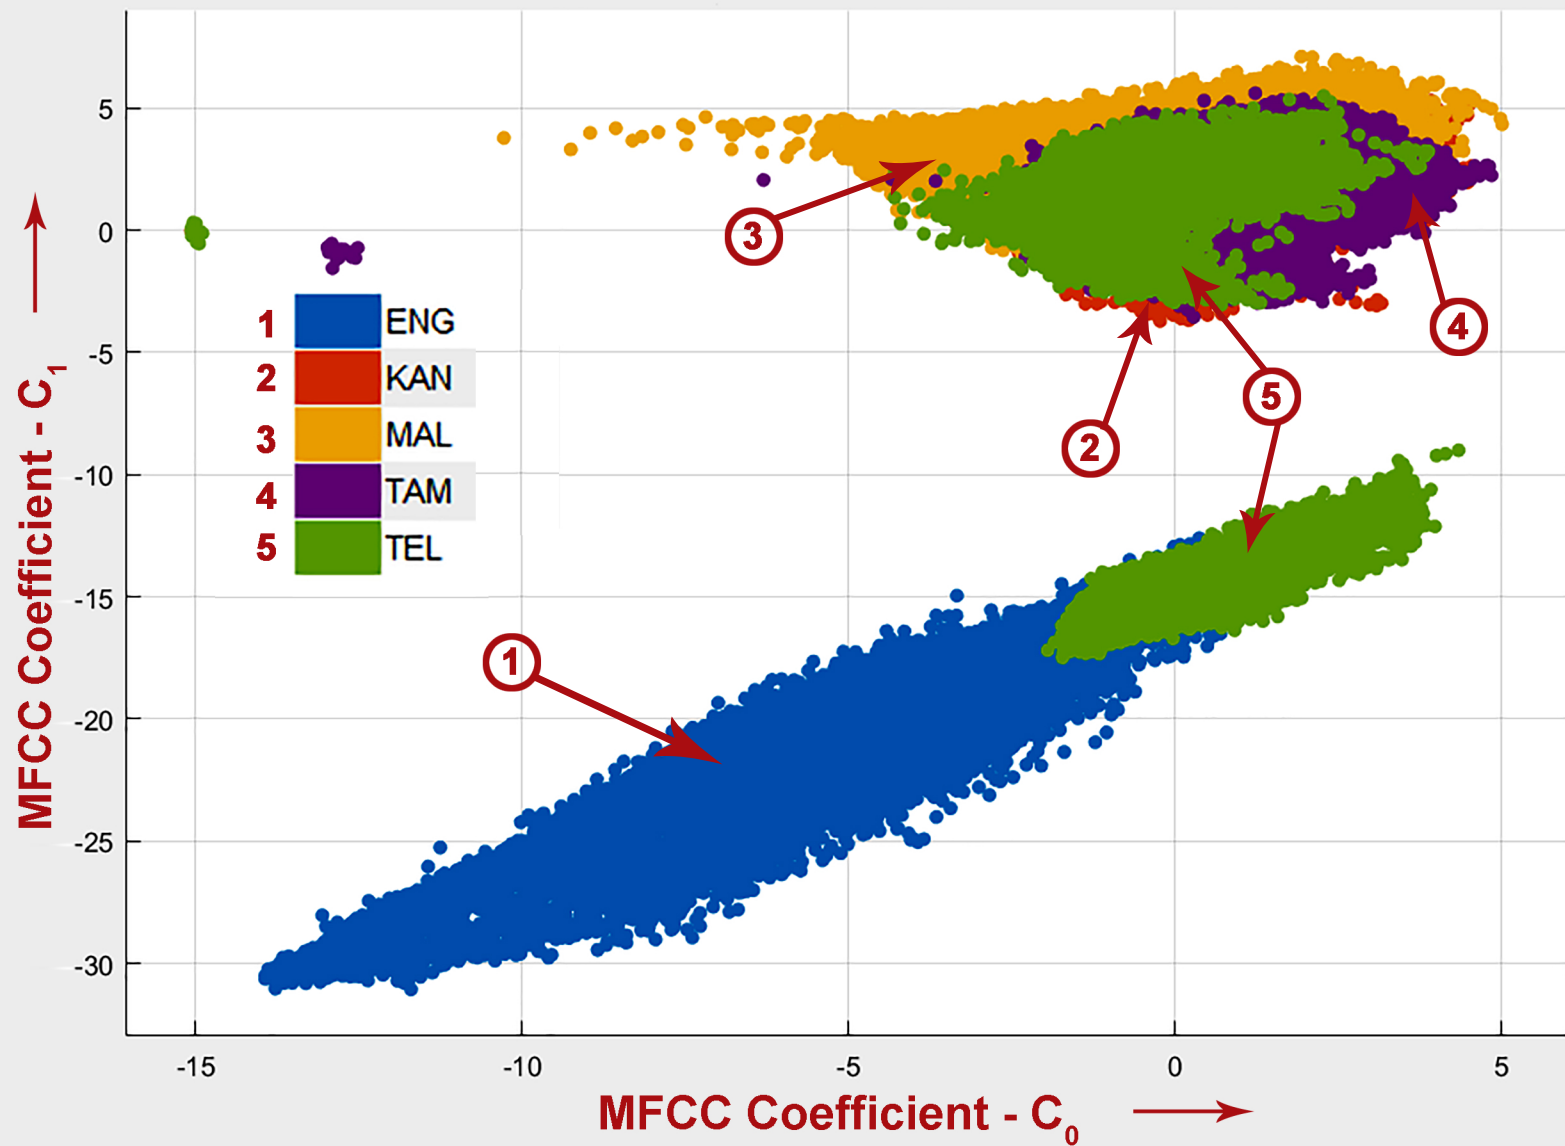

Supplement: OptionalSupplementaryMaterial [file GRK-SP-rajesh-AUG27.pdf › supplementary material/GRK-SP-rajesh-AUG27.pdf]

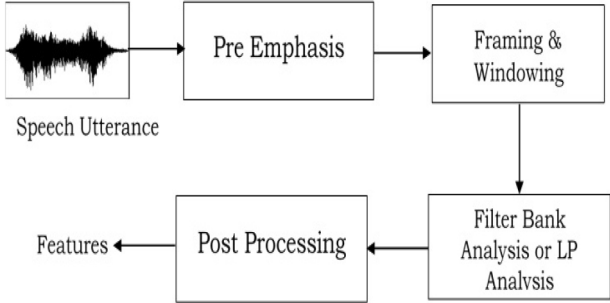

Supplement: OptionalSupplementaryMaterial [file front.pdf › supplementary material/front.pdf]

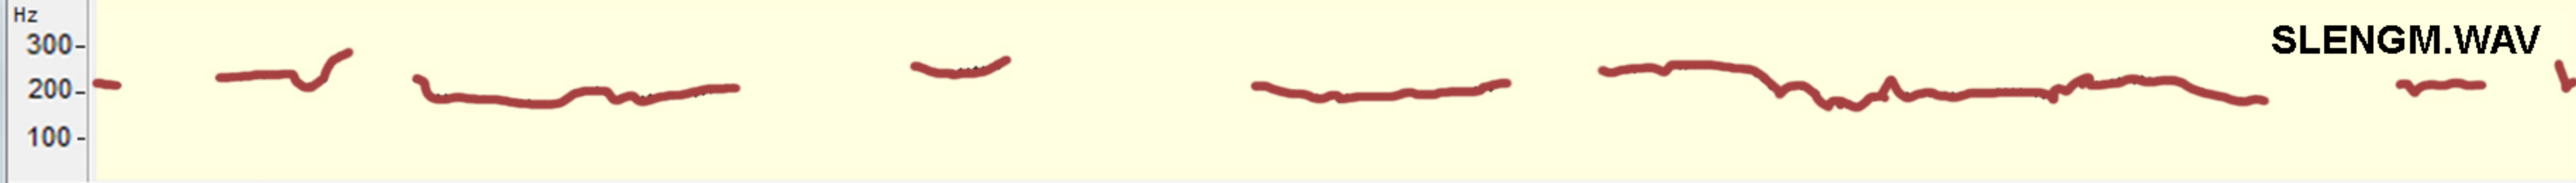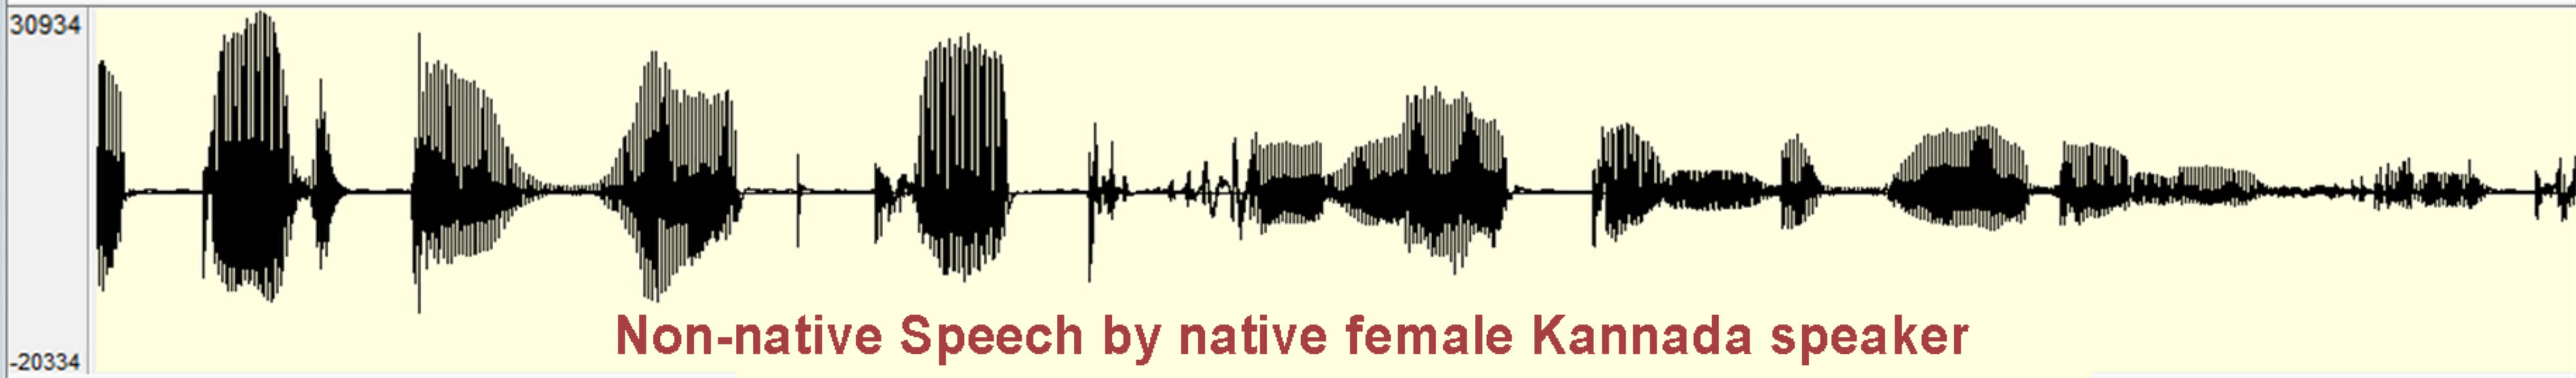

Supplement: OptionalSupplementaryMaterial [file slengm-wav - EH.pdf › supplementary material/slengm-wav - EH.pdf]
